# Supplementary material for: Minocycline Ameliorates Cognitive Impairments Without Modulate Microglial Reactivity in Sporadic Hypercholesterolemia: A Sex-Specific Analysis in Mice
Source: Research Square preprint supplement (doi:10.21203/rs.3.rs-6777773/v1), 2025-07-01
Supplement: Supplementary file 1 [file b875fb0b117d924ca03e750a.docx]

Supplementary material

Article: Minocycline Ameliorates Cognitive Impairments Without Modulate Microglial Reactivity in Sporadic Hypercholesterolemia: A Sex-Specific Analysis in Mice

Molecular Neurobiology

Matheus Scarpatto Rodrigues*, Natalia Baltazar do Nascimento, Gabriela Joras Baumart, Taina Schons, Alex Paulo Padilha, Mariana Viana Costa,Hemelin Resende Farias, Lilian Costa-Beber, Alessandra Gonçalves Machado, Lucas Santos, Rachel Krolow Bast, Josiane Budni, Daniel Pens Gelain, Jose Claudio Fonseca Moreira, David Engblom, Andreza Fabro de Bem, Jade de Oliveira*.

* Corresponding authors:

Jade de Oliveira, PhD

Programa de Pós-Graduação em Ciências Biológicas: Bioquímica, Departamento de Bioquímica, Instituto de Ciências Básicas da Saúde, Universidade Federal do Rio Grande do Sul (UFRGS), Porto Alegre, Brazil.

E-mail: [deoliveirajade10@gmail.com](mailto:deoliveirajade10@gmail.com)

Matheus Scarpatto Rodrigues, PhD

Department of Psychiatry and Neurology, University of Pittsburgh,

200 Meyran Avenue, Room 507,

Pittsburgh, PA 15213, USA.

Email: [matheus_scarodrigues@hotmail.com](mailto:matheus_scarodrigues@hotmail.com)

Supplementary Figure 1: Effects of diet and pharmacological intervention on mice glucose tolerance stratified by sex.

Supplementary Figure 2: Effects of diet and pharmacological intervention on the immunocontent of claudin-5 and RAGE in the PFC and hippocampus stratified by sex.

Supplementary Figure 3. Full-length Western blot images corresponding to Figure 5.

Supplementary Table 1: T-test coefficients for plasma cholesterol levels and ip-GTT between sexes.

Supplementary Table 2: T-test statistical coefficients for corporal body weight and body weight gain between sexes.

Supplementary Table 3: T-test statistical coefficients for behavioral and memory tasks.

Supplementary Table 4: T-test statistical coefficients for IBA-1 immunoreactivity, microglia branch length, and the number of endpoints in the hippocampal CA3 region.

Supplementary Table 5: T-test statistical coefficients for Claudin-5 and RAGE immunocontent in the prefrontal cortex and hippocampus.

Supplementary Table 6: T-test statistical coefficients for lectin-positive cells and IBA-1 within lectin in the hippocampal CA3 region.


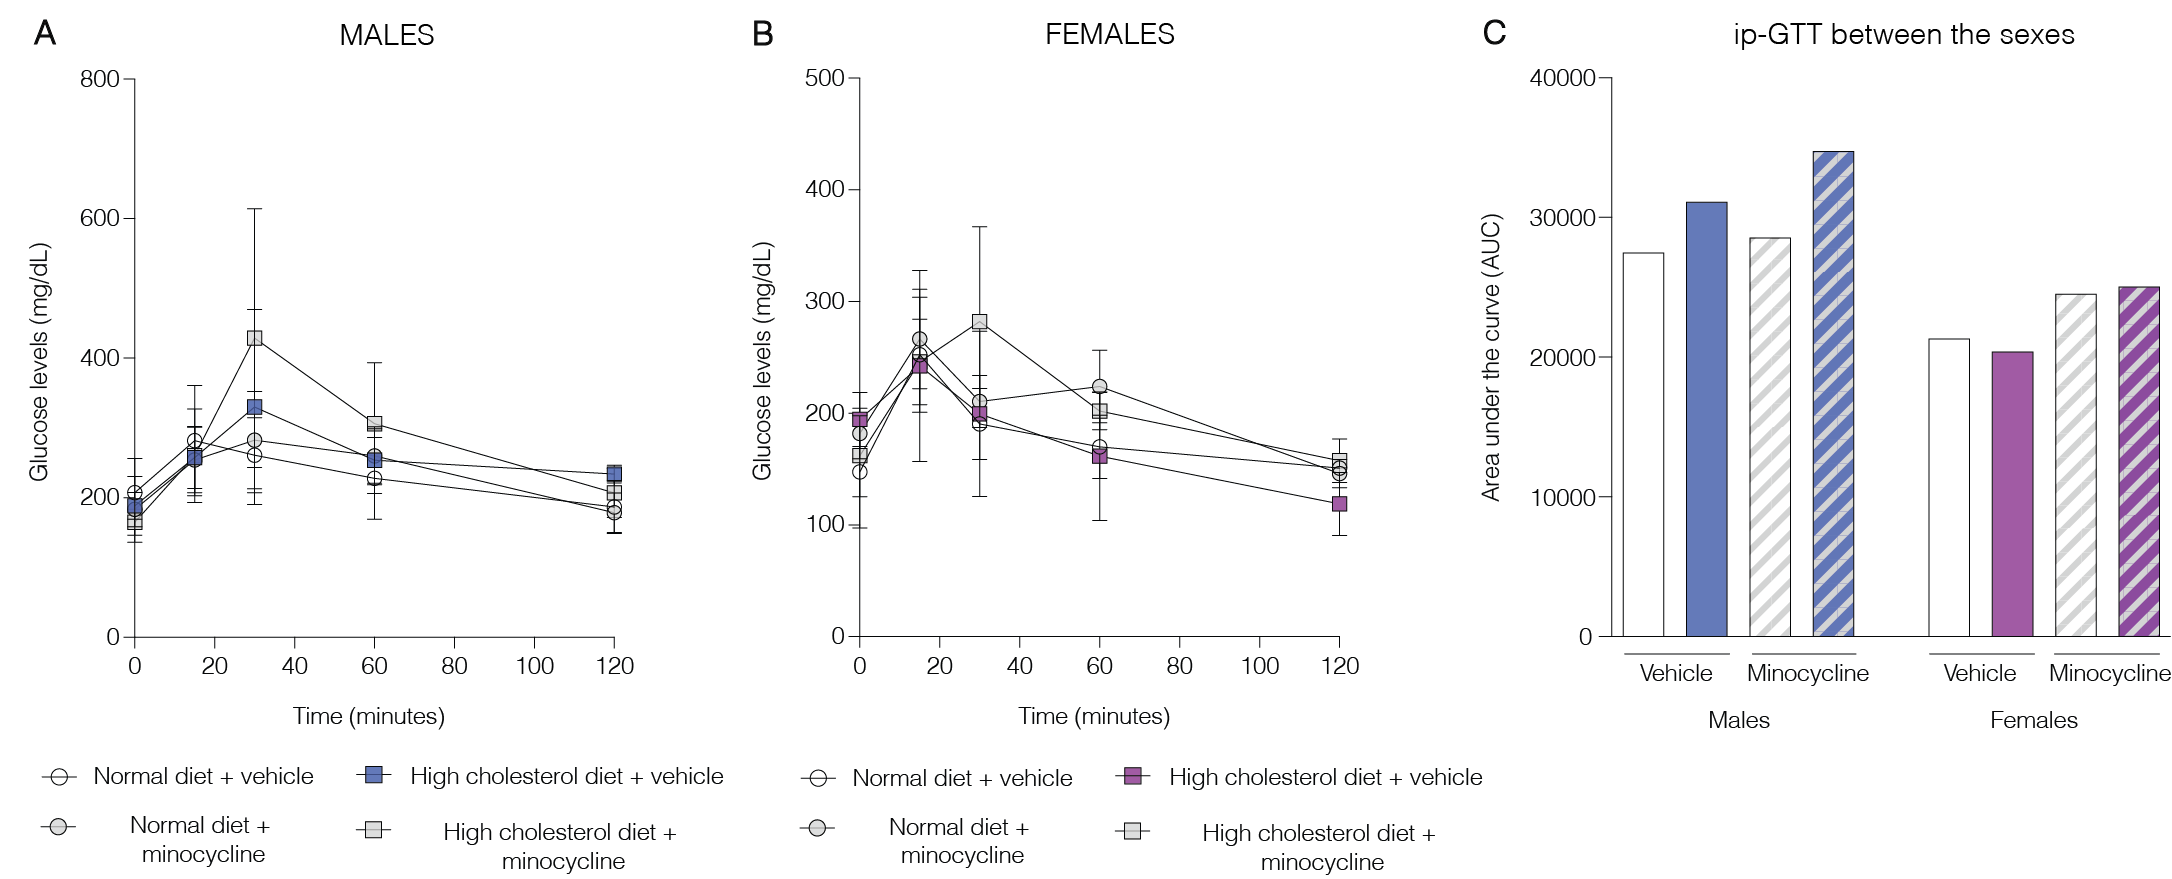


**Supplementary Figure 1: Effects of diet and pharmacological intervention on mice glucose tolerance stratified by sex.** (A) ip-GTT curve in males (n= 2-4 animals/group). (B) ip-GTT curve in females (n= 2-4 animals/group). (C) ip-GTT test between the sexes (n= 2-4 animals/group). Data are expressed as mean ± SEM. Two-way ANOVA accessed the effects of diet and pharmacological intervention on mice glucose tolerance. T-test accessed possible differences between sexes inside each experimental group.


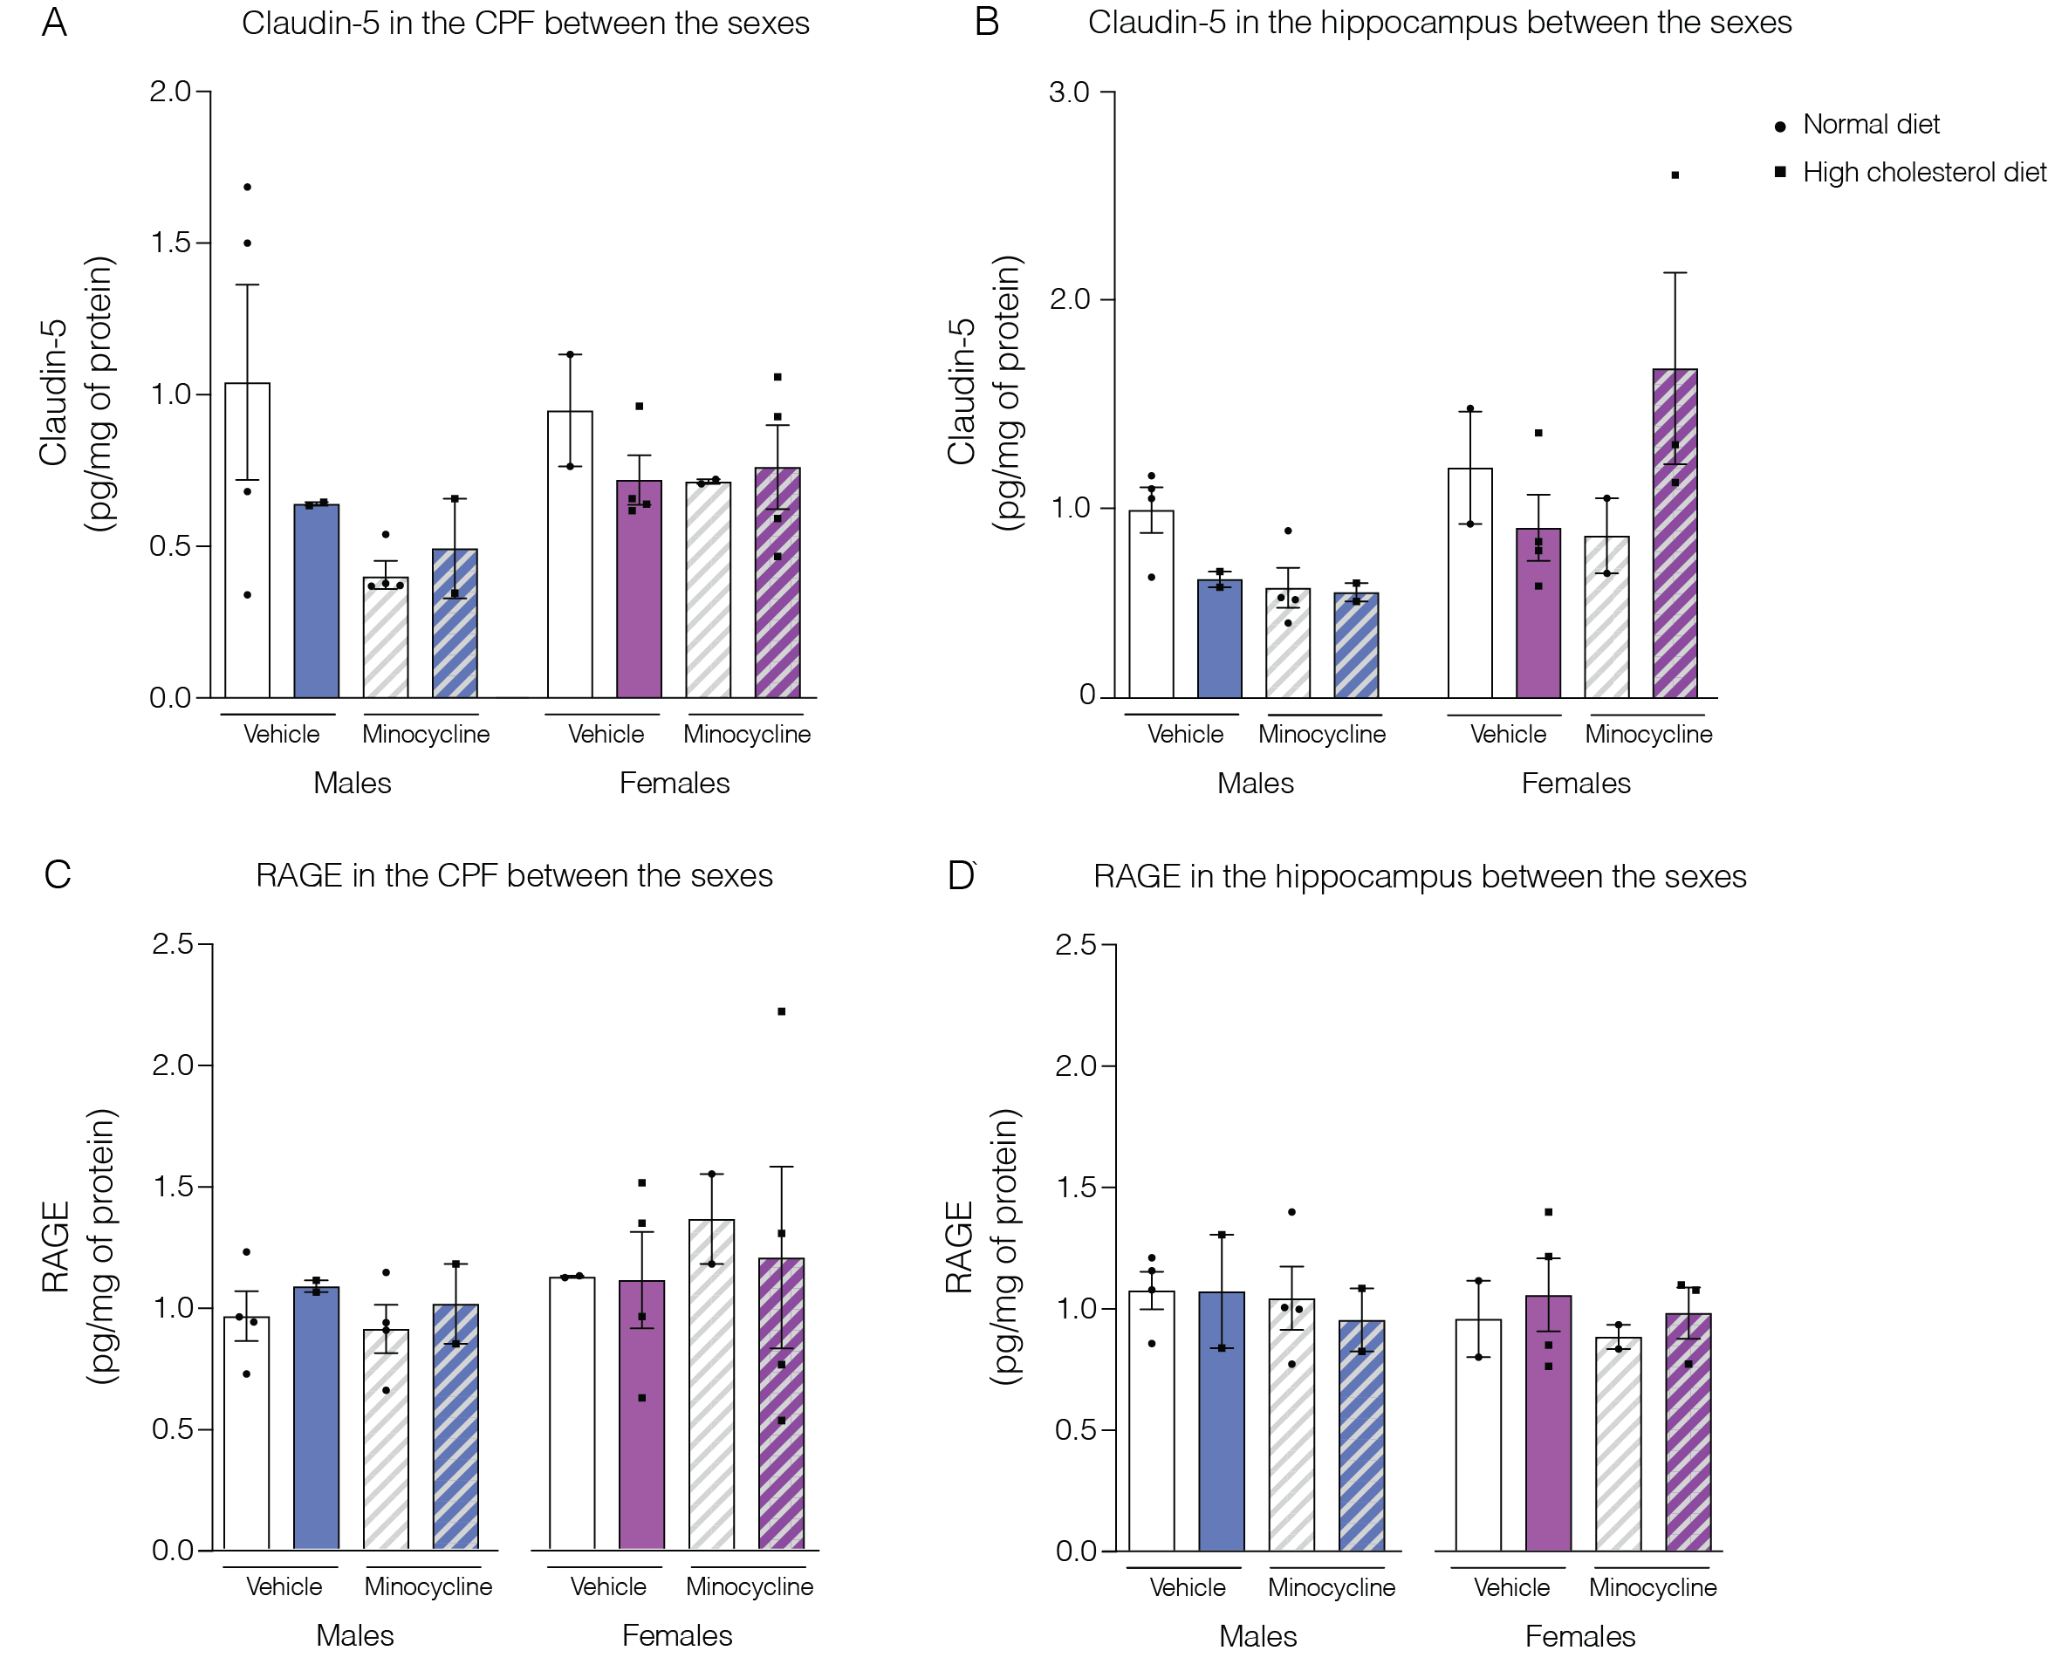


**Supplementary Figure 2: Effects of diet and pharmacological intervention on the immunocontent of claudin-5 and RAGE in the PFC and hippocampus stratified by sex.** (A) Claudin-5 in the PFC. (B) Claudin-5 in the hippocampus. (C) RAGE in the PFC. (D) RAGE in the hippocampus (n= 2-4 animals/group). Data are expressed as mean ± SEM.


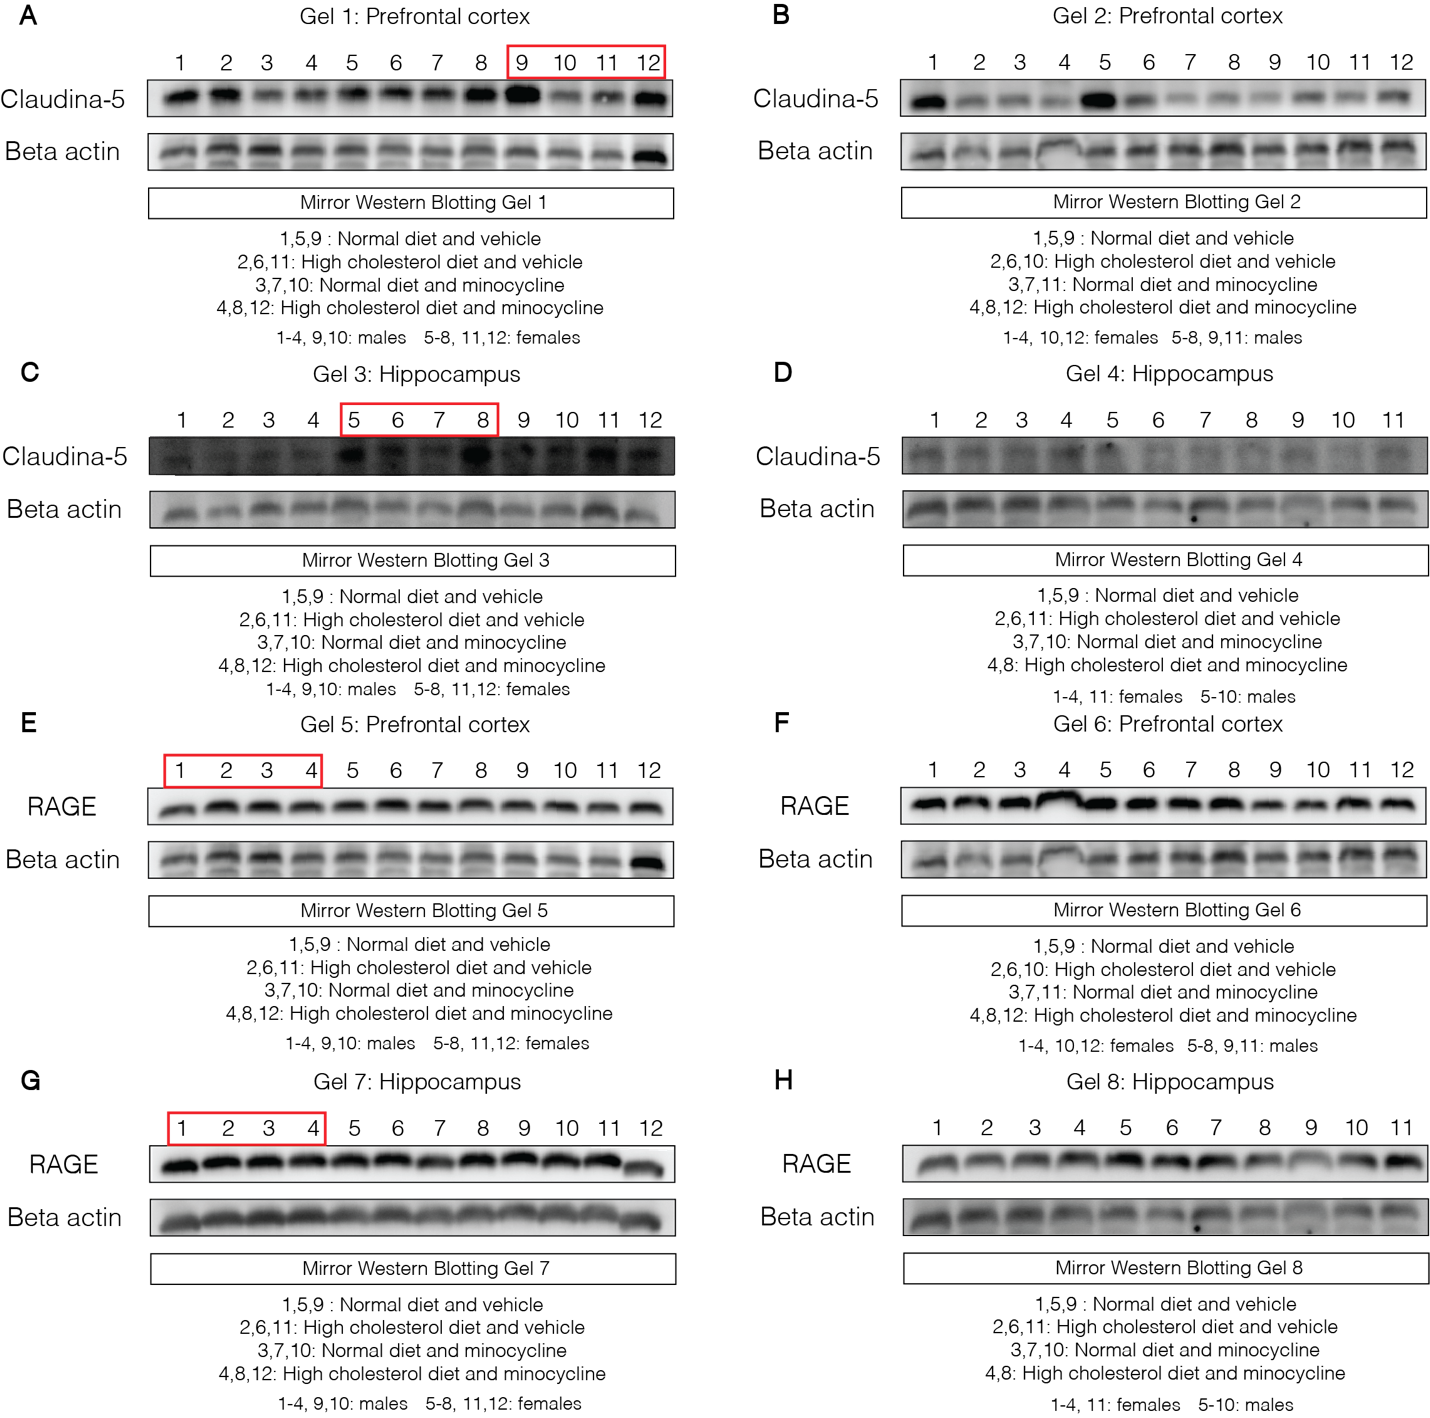


**Supplementary Figure 3. Full-length Western blot images corresponding to Figure 5.** Uncropped membranes show the complete immunoreactive bands for Claudin-5 in the prefrontal cortex (A, B) and hippocampus (C, D), and for RAGE in the prefrontal cortex (E, F) and hippocampus (G, H). Red boxes indicate the cropped lanes used as representative images in the main Figure 5. Sample loading order, including experimental group and sex, is detailed below each gel image. Mirror blot schematics illustrate the sample distribution across dietary conditions, treatment, and sex.

| **Supplementary Table 1: T-test coefficients for plasma cholesterol levels and ip-GTT between sexes.** | | | |
| --- | --- | --- | --- |
| **A)** **T-test coefficients for comparison between sexes - cholesterol levels** | | | |
| Group | df | T-value | P value |
| ND vehicle male vs  ND vehicle female | 9.423 | -2.168 | 0.056 |
| HCD vehicle male vs HCD vehicle female | 6.786 | -0.745 | 0.480 |
| ND minocycline male vs ND minocycline female | 9.990 | -9.804 | **<0.001** |
| HCD minocycline male vs HCD minocycline female | 2.697 | -2.336 | 0.111 |
| **B)** **T-test coefficients for comparison between sexes - ip-GTT** | | | |
| Group | df | T-value | P value |
| ND vehicle male vs  ND vehicle female | 3.560 | -1.691 | 0.174 |
| HCD vehicle male vs HCD vehicle female | 1.609 | -2.054 | 0.206 |
| ND minocycline male vs ND minocycline female | 2.679 | -2.338 | 0.118 |
| HCD minocycline male vs HCD minocycline female | 1.098 | -1.299 | 0.402 |

| **Supplementary Table 2: T-test statistical coefficients for corporal body weight and body weight gain between sexes.** | | | |
| --- | --- | --- | --- |
| **A)** **T-test coefficients for comparison between sexes - corporal weight** | | | |
| Group | df | T-value | P value |
| ND vehicle male vs  ND vehicle female | 20.233 | -4.416 | **<0.001** |
| HCD vehicle male vs HCD vehicle female | 20.944 | -3.193 | **0.004** |
| ND minocycline male vs ND minocycline female | 17.023 | -1.478 | 0.157 |
| HCD minocycline male vs HCD minocycline female | 19.555 | -4.581 | **<0.001** |
| **B)** **T-test coefficients for comparison between sexes - weight gain** | | | |
| Group | df | T-value | P value |
| ND vehicle male vs  ND vehicle female | 21.869 | -1.327 | 0.198 |
| HCD vehicle male vs HCD vehicle female | 21.999 | 1.031 | 0.313 |
| ND minocycline male vs ND minocycline female | 12.029 | 1.946 | 0.075 |
| HCD minocycline male vs HCD minocycline female | 20.000 | -0.064 | 0.949 |

| **Supplementary Table 3: T-test statistical coefficients for behavioral and memory tasks.** | | | |
| --- | --- | --- | --- |
| **A)** **T-test coefficients for comparison between sexes - total traveled distance** | | | |
| Group | df | T-value | P value |
| ND vehicle male vs  ND vehicle female | 7.519 | 1.193 | 0.268 |
| HCD vehicle male vs HCD vehicle female | 6.069 | 1.836 | 0.115 |
| ND minocycline male vs ND minocycline female | 9.658 | 2.141 | 0.058 |
| HCD minocycline male vs HCD minocycline female | 9.806 | 3.802 | **0.003** |
| **B)** **T-test coefficients for comparison between sexes - object recognition index** | | | |
| Group | df | T-value | P value |
| ND vehicle male vs  ND vehicle female | 6.512 | 0.771 | 0.467 |
| HCD vehicle male vs HCD vehicle female | 7.585 | -1.093 | 0.305 |
| ND minocycline male vs ND minocycline female | 6.897 | 1.401 | 0.204 |
| HCD minocycline male vs HCD minocycline female | 5.617 | 0.750 | 0.483 |
| **C)** **T-test coefficients for comparison between sexes object location index** | | | |
| Group | df | T-value | P value |
| ND vehicle male vs  ND vehicle female | 3.512 | -1.976 | 0.129 |
| HCD vehicle male vs HCD vehicle female | 7.721 | -2.513 | **0.037** |
| ND minocycline male vs ND minocycline female | 5.340 | 0.867 | 0.423 |
| HCD minocycline male vs HCD minocycline female | 5.977 | 1.073 | 0.324 |

| **Supplementary Table 4: T-test statistical coefficients for IBA-1 immunoreactivity, microglia branch length, and the number of endpoints in the hippocampal CA3 region.** | | | |
| --- | --- | --- | --- |
| **A)** **T-test coefficients for comparison between sexes - IBA-1 immunoreactivity** | | | |
| Group | df | T-value | P value |
| ND vehicle male vs  ND vehicle female | 7.870 | 0.128 | 0.901 |
| HCD vehicle male vs HCD vehicle female | 6.987 | -0.734 | 0.486 |
| ND minocycline male vs ND minocycline female | 4.753 | -0.757 | 0.484 |
| HCD minocycline male vs HCD minocycline female | 5.023 | -0.839 | 0.439 |
| **B)** **T-test coefficients for comparison between sexes - microglia branch length** | | | |
| Group | df | T-value | P value |
| ND vehicle male vs  ND vehicle female | 7.050 | -2.747 | **0.028** |
| HCD vehicle male vs HCD vehicle female | 5.236 | -1.219 | 0.274 |
| ND minocycline male vs ND minocycline female | 5.810 | -0.729 | 0.494 |
| HCD minocycline male vs HCD minocycline female | 7.103 | -1.752 | 0.122 |
| **C)** **T-test coefficients for comparison between sexes - microglia number of endpoints** | | | |
| Group | df | T-value | P value |
| ND vehicle male vs  ND vehicle female | 7.043 | -1.500 | 0.176 |
| HCD vehicle male vs HCD vehicle female | 5.994 | -0.687 | 0.517 |
| ND minocycline male vs ND minocycline female | 6.350 | -0.134 | 0.897 |
| HCD minocycline male vs HCD minocycline female | 4.870 | -0.490 | 0.644 |
| **D)** **T-test coefficients for comparison between sexes - cd68 (%IBA-1)** | | | |
| Group | df | T-value | P value |
| ND vehicle male vs  ND vehicle female | 2.374 | -0.931 | 0.436 |
| HCD vehicle male vs HCD vehicle female | 3.672 | -0.593 | 0.587 |
| ND minocycline male vs ND minocycline female | 2.566 | -1.649 | 0.212 |
| HCD minocycline male vs HCD minocycline female | 3.839 | 0.360 | 0.737 |

| **Supplementary Table 5: T-test statistical coefficients for Claudin-5 and RAGE immunocontent in the prefrontal cortex and hippocampus.** | | | |
| --- | --- | --- | --- |
| **A)** **T-test coefficients for comparison between sexes - Claudin-5 in the prefrontal cortex** | | | |
| Group | df | T-value | P value |
| ND vehicle male vs  ND vehicle female | 3.999 | -0.249 | 0.815 |
| HCD vehicle male vs HCD vehicle female | 2.594 | 0.702 | 0.540 |
| ND minocycline male vs ND minocycline female | 3.041 | 1.354 | 0.267 |
| HCD minocycline male vs HCD minocycline female | 3.201 | 1.489 | 0.227 |
| **B)** **T-test coefficients for comparison between sexes - Claudin-5 in the hippocampus** | | | |
| Group | df | T-value | P value |
| ND vehicle male vs  ND vehicle female | 1.344 | 0.695 | 0.587 |
| HCD vehicle male vs HCD vehicle female | 2.442 | 1.885 | 0.176 |
| ND minocycline male vs ND minocycline female | 3.355 | 0.257 | 0.811 |
| HCD minocycline male vs HCD minocycline female | 2.716 | 2.738 | 0.079 |
| **C)** **T-test coefficients for comparison between sexes - RAGE in the prefrontal cortex** | | | |
| Group | df | T-value | P value |
| ND vehicle male vs  ND vehicle female | 3.007 | 1.584 | 0.211 |
| HCD vehicle male vs HCD vehicle female | 3.985 | 1.515 | 0.204 |
| ND minocycline male vs ND minocycline female | 2.331 | 0.492 | 0.664 |
| HCD minocycline male vs HCD minocycline female | 2.999 | -0.522 | 0.637 |
| **D)** **T-test coefficients for comparison between sexes - RAGE in the hippocampus** | | | |
| Group | df | T-value | P value |
| ND vehicle male vs  ND vehicle female | 1.518 | -0.668 | 0.590 |
| HCD vehicle male vs HCD vehicle female | 3.813 | -1.069 | 0.347 |
| ND minocycline male vs ND minocycline female | 2.752 | 0.688 | 0.544 |
| HCD minocycline male vs HCD minocycline female | 0.168 | 2.258 | 0.880 |

| **Supplementary Table 6: T-test statistical coefficients for lectin-positive cells and IBA-1 within lectin in the hippocampal CA3 region.** | | | |
| --- | --- | --- | --- |
| **A)** **T-test coefficients for comparison between sexes - lectin-positive cells in the hippocampus** | | | |
| Group | df | T-value | P value |
| ND vehicle male vs  ND vehicle female | 13.013 | -0.773 | 0.453 |
| HCD vehicle male vs HCD vehicle female | 12.578 | 0.696 | 0.498 |
| ND minocycline male vs ND minocycline female | 13.975 | -1.554 | 0.142 |
| HCD minocycline male vs HCD minocycline female | 13.969 | 0.416 | 0.683 |
| **B)** **T-test coefficients for comparison between sexes - IBA-1 within lectin in the hippocampus** | | | |
| Group | df | T-value | P value |
| ND vehicle male vs  ND vehicle female | 7.365 | 0.339 | 0.743 |
| HCD vehicle male vs HCD vehicle female | 4.105 | 0.717 | 0.511 |
| ND minocycline male vs ND minocycline female | 7.980 | 0.157 | 0.878 |
| HCD minocycline male vs HCD minocycline female | 6.537 | -0.016 | 0.987 |
